# Supplementary material for: TRANSFER OF RADIOCAESIUM FROM CONTAMINATED BOTTOM SEDIMENTS TO MARINE ORGANISMS THROUGH BENTHIC FOOD CHAIN IN POST-FUKUSHIMA AND POST-CHERNOBYL PERIODS
Source: Copernicus journal article supplement (doi:10.5194/bg-2015-654), 2016-01-18
Supplement: Supplementary file 1 [file bg-2015-654-supplement.pdf]

**Supplementary materials to the paper “Transfer of radiocaesium from contaminated bottom sediments to marine organisms through benthic food chain”**

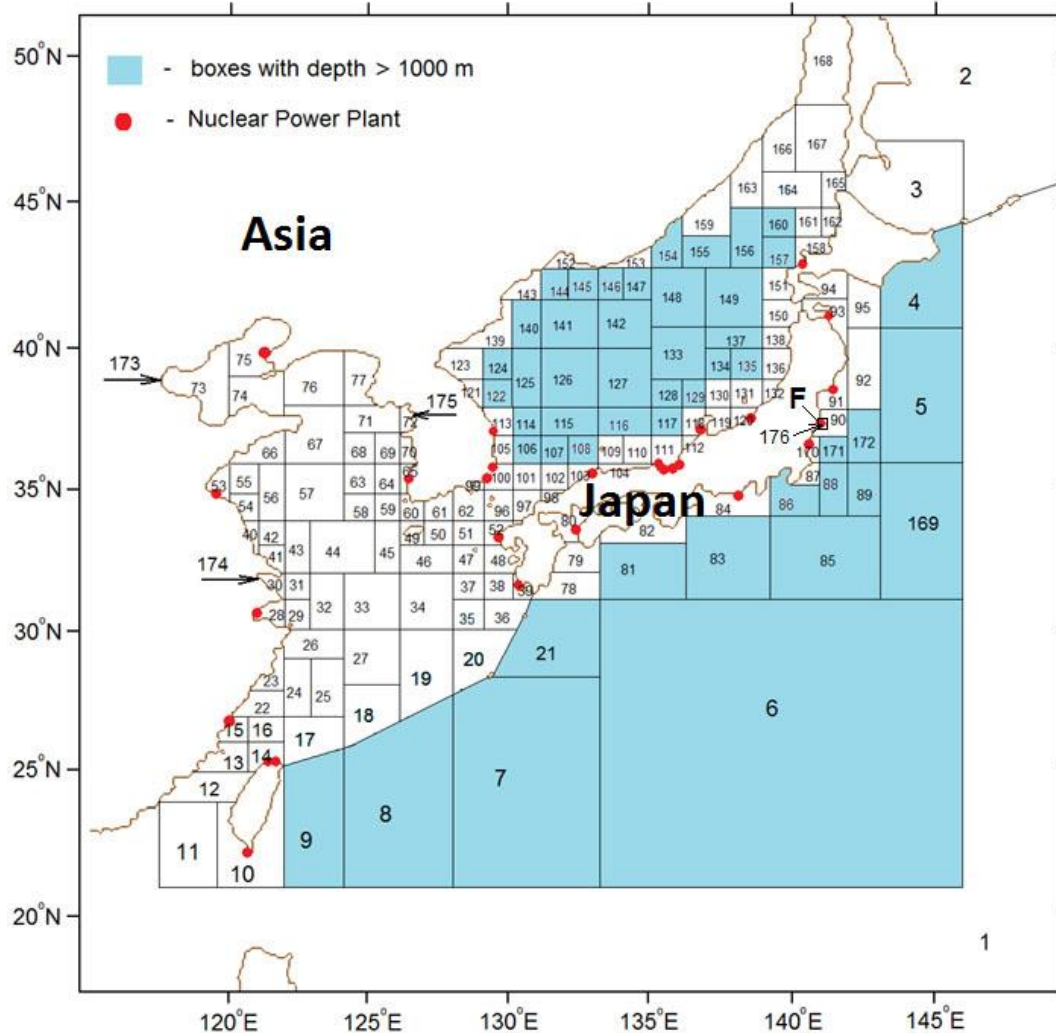

Fig. S1. The compartment system for the Northwestern Pacific. The shaded boxes represent the deep water boxes. The boxes with shaded lines present the areas with deposition from the Fukushima Dai-ichi accident. The arrows with numbers show the compartments representing estuaries of large rivers (174 – the Yangtze River, 173 – the Huanghe River and 175 – the Han River). The NPPs are shown by filled circles. Letter “F” represent the Fukushima Dai-ichi NPP.

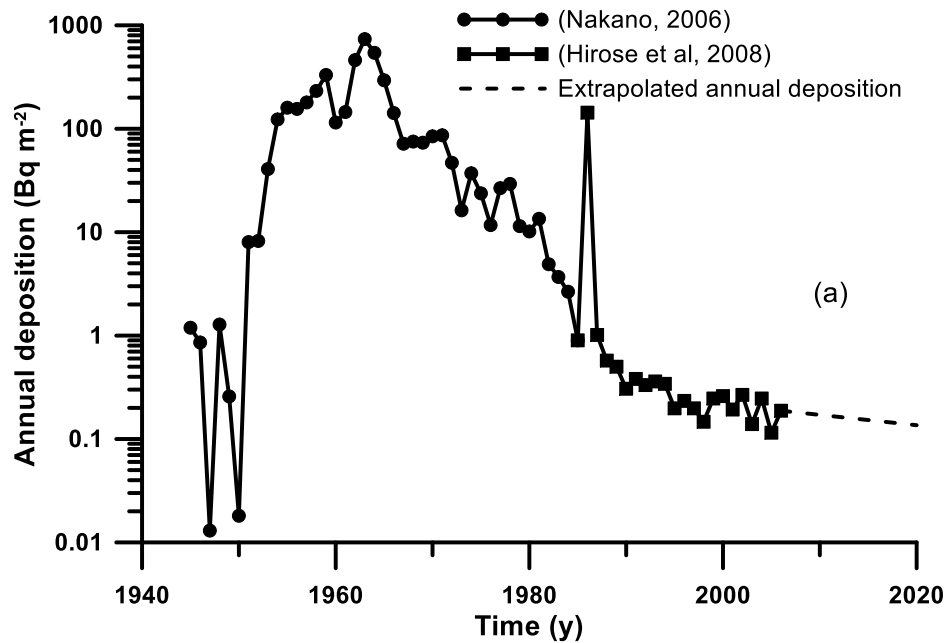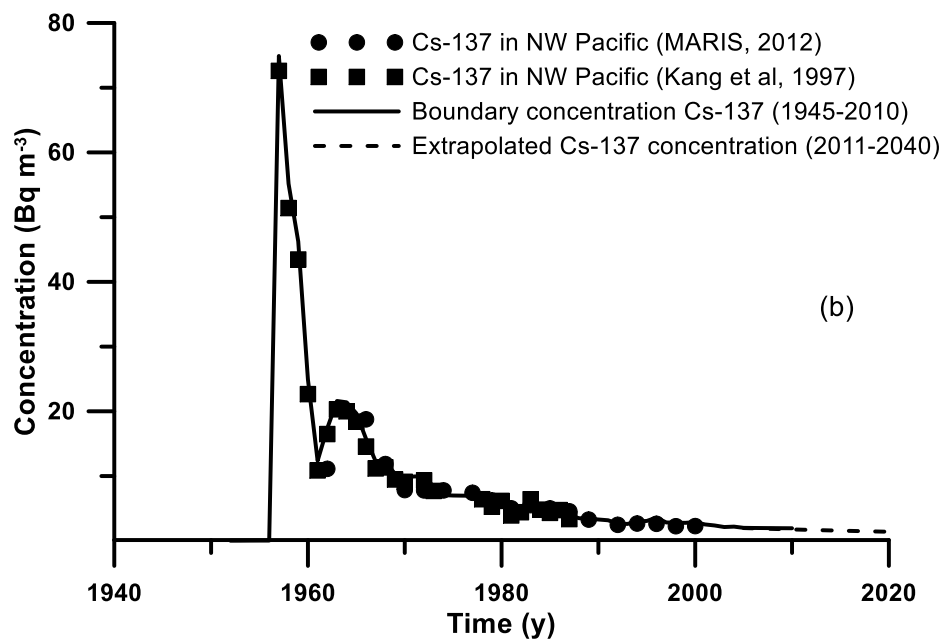

Fig. S2. Time variations of the annual deposition on the surface compiled from Nakano (2006) and Hirose et al (2008) (a) and the boundary values for the  $^{137}\text{Cs}$  concentration in the NW Pacific compiled from MARIS (2012) database and Kang et al. (1997) (b).

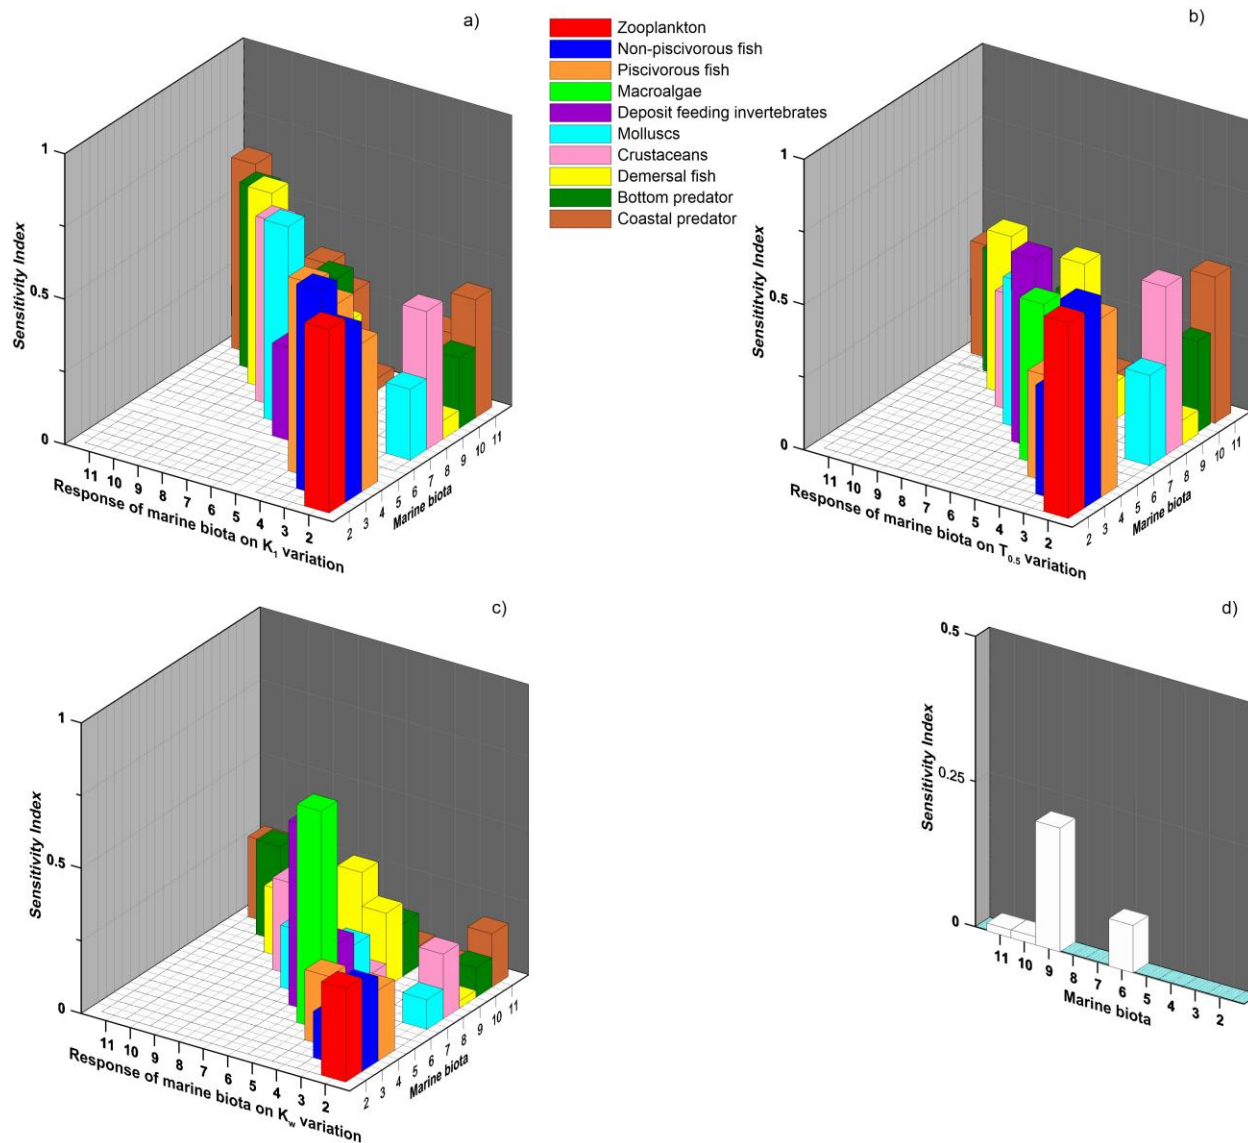

Fig. S3. Sensitivity indexes calculated for food uptake rate  $K_1$  (a), biological half-life  $T_{0.5}$  of  $^{137}\text{Cs}$  in the organism (b), water uptake rate  $K_w$  (c) and for ratio of concentration of assimilated radioactivity from organic fraction of bottom sediment to the concentration of radioactivity of bulk bottom sediment  $\phi_{org}$ .

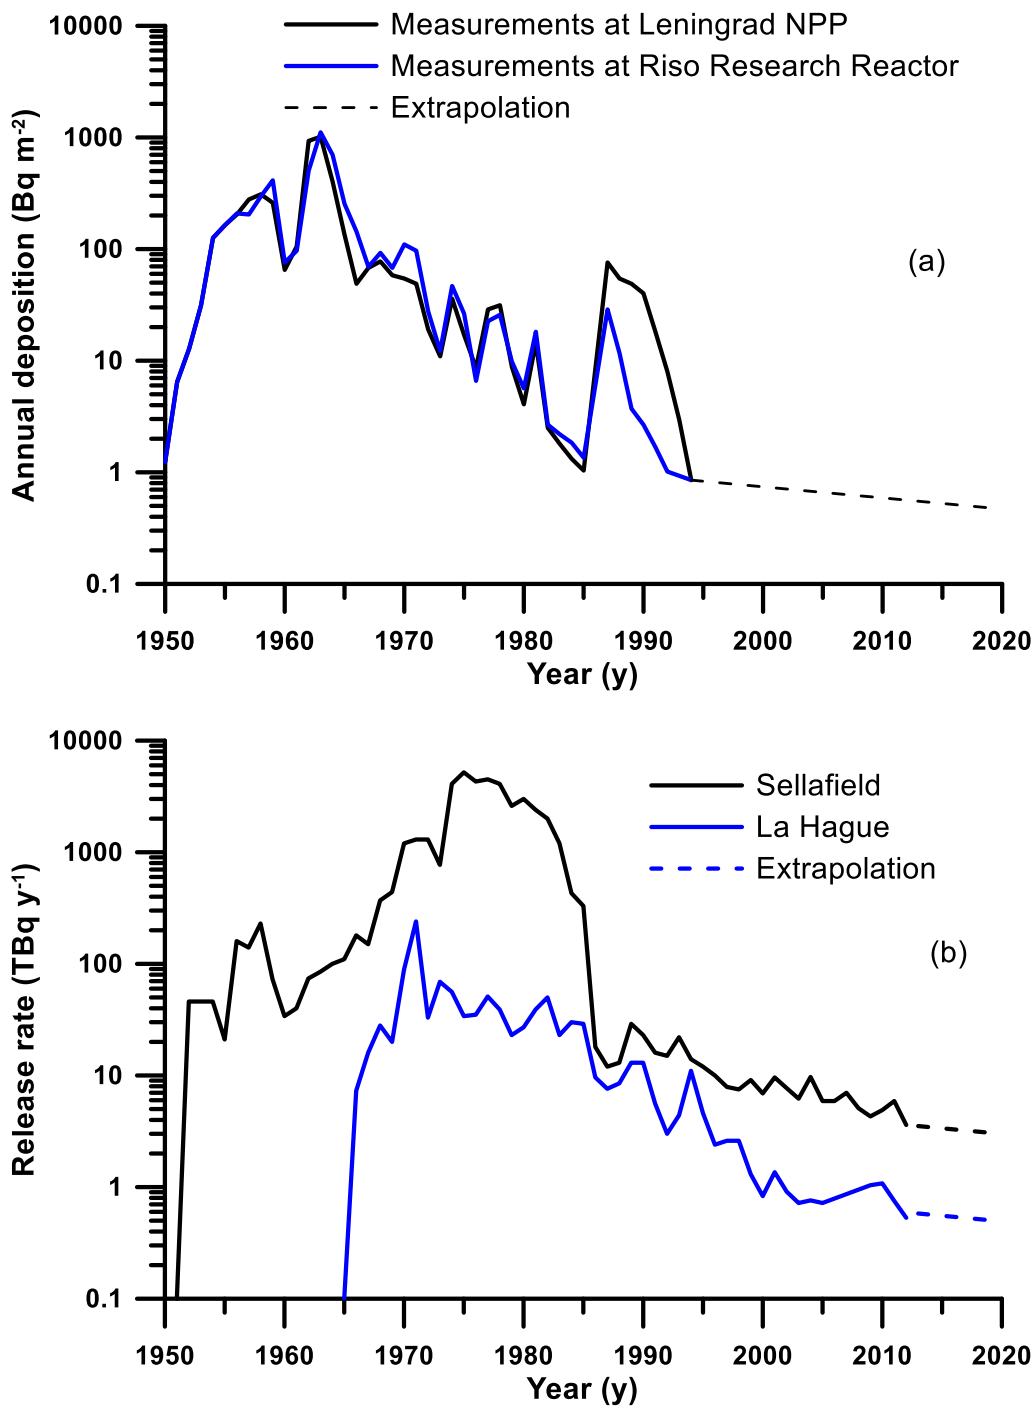

Fig. S4. Global atmosphere deposition rate of <sup>137</sup>Cs on the Baltic Sea (HELCOM, 1995) (a) and release of <sup>137</sup>Cs from Sellafield and La Hague reprocessing plants (HELCOM, 2009).

Table S1. Atmosphere deposition density of  $^{137}\text{Cs}$  in 1986 due to the Chernobyl accident (HELCOM, 1995)

| Basin           | Deposition density,<br>$\text{Bq m}^{-2}$ | Inventory, PBq | Boxes        |
|-----------------|-------------------------------------------|----------------|--------------|
| North-Atlantic  | 1000                                      | 35.4           | 3-34         |
| Kattegat        | 1700                                      | 0.04           | 35-40        |
| Belt Sea        | 1800                                      | 0.05           | 41-43        |
| Baltic Proper   | 4500                                      | 0.82           | 44-57, 59-61 |
| Gulf of Riga    | 5000                                      | 0.08           | 58           |
| Gulf of Finland | 15000                                     | 0.83           | 62-67        |
| Aland Sea       | 72500                                     | 0.55           | 68-69, 71-72 |
| Archipelago Sea | 17300                                     | 0.04           | 70           |
| Bothnian Sea    | 35000                                     | 1.94           | 73-79        |
| Bothnian Bay    | 6900                                      | 0.31           | 80-81        |
