# Supplementary material for: TRANSFER OF RADIOCAESIUM FROM CONTAMINATED BOTTOM SEDIMENTS TO MARINE ORGANISMS THROUGH BENTHIC FOOD CHAIN IN POST-FUKUSHIMA AND POST-CHERNOBYL PERIODS
Source: Copernicus journal article supplement (doi:10.5194/bg-2015-654), 2016-01-18
Supplement: Supplementary file [file bg-2015-654-RC2-supplement.pdf]

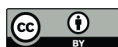

# TRANSFER OF RADIOCAESIUM FROM CONTAMINATED BOTTOM SEDIMENTS TO MARINE ORGANISMS THROUGH BENTHIC FOOD CHAIN IN POST-FUKUSHIMA AND POST-CHERNOBYL PERIODS

Roman Bezhenar<sup>1</sup>, Kyung Tae Jung<sup>2</sup>, Vladimir Maderich<sup>1</sup>, Stefan Willemsen<sup>3</sup>,  
 Govert de With<sup>3</sup>, and Fangli Qiao<sup>4</sup>

<sup>1</sup>Institute of Mathematical Machine and System Problems, Glushkov av., 42, Kiev 03187, Ukraine

<sup>2</sup>Korea Institute of Ocean Science and Technology, 787, Hae-an-ro, Ansan 426-744 Republic of Korea

<sup>3</sup>NRG, Utrechtseweg 310, 6800 ES Arnhem, the Netherlands

<sup>4</sup>First Institute of Oceanography, 6 Xianxialing Road Qingdao 266061 China

*Correspondence to:* Vladimir Maderich (vladmad@gmail.com)

**Abstract.** After the earthquake and tsunami on 11 March, 2011 damaged the Fukushima Dai-ichi Nuclear Power Plant (FDNPP), an accidental release of a large amount of radioactive isotopes into both the air and the ocean occurred. Measurements provided by the Japanese agencies over the past four years show that elevated concentrations of <sup>137</sup>Cs still remain in sediments, benthic organisms and demersal fishes in the coastal zone around the FDNPP. These observations indicate that there are <sup>137</sup>Cs transfer pathways from bottom sediments to the marine organisms. To describe the transfer quantitatively, the dynamic food chain model BURN has been extended to include benthic marine organisms. The extended model takes into account both pelagic and benthic marine organisms grouped into several classes based on their trophic level and type of species: phytoplankton, zooplankton, and fishes (two types: piscivorous and non-piscivorous) for the pelagic food chain; deposit feeding invertebrates, demersal fishes feeding by benthic invertebrates and bottom omnivorous predators for the benthic food chain; crustaceans, molluscs and coastal predators feeding on both pelagic and benthic organisms. Bottom invertebrates ingest organic parts of bottom sediments with adsorbed radionuclides which then migrate up through the food chain. All organisms take radionuclides directly from water as well as food. The model was implemented into the compartment model POSEIDON-R and applied to the Northwestern Pacific for the period of 1945-2010 and then for the period of 2011-2020 to assess the radiological consequences of releases of <sup>137</sup>Cs due to FDNPP accident. The model simulations for activity concentrations of <sup>137</sup>Cs in both pelagic and benthic organisms in the coastal area around the FDNPP agree well with measurements for the period of 2011-2015. The decrease constant in the fitted exponential function of simulated concentration for the deposit ingesting



invertebrates ( $0.45 \text{ y}^{-1}$ ) is close to the decrease constant for the sediment observations ( $0.44 \text{ y}^{-1}$ ), indicating that the gradual decrease of activity in the demersal fish (decrease constant is  $0.46 \text{ y}^{-1}$ ) was **caused** by the transfer of activity from organic matter deposited in bottom sediment through the deposit feeding invertebrates. The estimated from model transfer coefficient from bulk sediment to demersal fish in the model for 2012-2020 (0.13) is larger than that to the deposit feeding invertebrates (0.07) **due to the biomagnification effect**. In addition, the transfer of  $^{137}\text{Cs}$  through food webs for the period of 1945-2020 has been modelled for the Baltic Sea that was essentially contaminated due to global fallout and the Chernobyl accident. The model simulation results obtained with generic parameters are also in good agreement with available measurements in the Baltic Sea. Due to weak water exchange with the North Sea of the semi-enclosed Baltic Sea the chain of water-sediments-biota slowly evolves into a quasi-equilibrium state unlike the processes off the open Pacific Ocean coast where the FDNPP is located. Obtained results **demonstrate** the **importance** of the benthic food chain in the long-term transfer of  $^{137}\text{Cs}$  from contaminated bottom sediments to marine organisms and the potential of a generic model for the use in different regions of the World Ocean.

## 1 Introduction

A catastrophic earthquake and tsunami that occurred on 11 March, 2011 severely damaged the Fukushima Dai-ichi Nuclear Power Plant (FDNPP). The loss of power and the subsequent overheating, meltdowns, and hydrogen explosions at the FDNPP site resulted in the uncontrolled release of radioactivity into the air and ocean (Povinec et al., 2013). The atmospheric fallout over the land and the ocean peaked in mid-March whereas the direct release to the ocean from FDNPP peaked in the beginning of April. Approximately 80% of the radioactivity released due to the accident in March-April 2011 was either directly discharged into the ocean or deposited onto the ocean surface from the atmosphere. The concentration of  $^{137}\text{Cs}$  in the ocean reached a maximum in mid-April of 2011 and has thereafter declined (by a factor of  $10^5$ ), except for the area around the FDNPP, where continuous leaks of contaminated water have been reported (Kanda, 2013). However, the concentration of  $^{137}\text{Cs}$  in the bottom sediment that was contaminated by water with high concentrations in April-May 2011 remains quite high and is showing signs of very slow decrease with time (Otosaka and Kobayashi, 2013; Kusakabe et al. 2013; Ambe et al 2014; Black and Buesseler, 2014). The concentration of organically bound  $^{137}\text{Cs}$  in coastal areas is several times higher than that of the bulk sediment (Otosaka and Kobayashi, 2013; Ono et al., 2015) due to  $^{137}\text{Cs}$  adsorption on organic matter. It is worth noting that organic content in the shelf of Fukushima and Ibaraki Prefectures varies in the range of 0.1-25% (Otosaka and Kobayashi, 2013; Ambe et al., 2014; Ono et al., 2015). The preferential adsorption of  $^{137}\text{Cs}$  on organic matter can be explained by the partial coverage of fine mineral sediment by organic substances and subsequent blocking of sorption (Kim et al., 2006; Ono et al., 2015). Comparison of the concentration of  $^{137}\text{Cs}$  in the sediment and benthic invertebrates

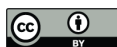

(Sohtome et al., 2014) and in the demersal fishes (Buesseler et al., 2012; Wada et al., 2013; Tateda et al., 2013) suggests that the continual ingestion of organic matter from sediments can be an important contamination pathway for all components of the benthic food web. However, in most of the benthic food web models applied to the FDNPP accident, the deposit ingestion is not included as a transfer  
60 process in the food-chain (Tateda et al., 2013; Keum et al., 2015; Vives i Batlle 2015; Tateda et al., 2015a,b; Vives i Batlle et al., 2015a,b).

Several models were used to perform long term assessments of the radiological impact in the marine environment due to the FDNPP accident (Nakano and Povinec, 2012; Maderich et al., 2014a,b). In particular, the compartment model POSEIDON-R (Maderich et al., 2014a,b) correctly predicted  
65 the concentration of  $^{137}\text{Cs}$  and  $^{90}\text{Sr}$  in water and sediments in the coastal box (30x15 km) around the FDNPP for 2011-2013. In that study the flux of radionuclides due to the underground leakage of contaminated waters from FDNPP (Kanda, 2013) was taken into account. However, the version of the dynamic food-chain model BURN (Biological Uptake model of Radionuclides) used in the POSEIDON-R model (Helting et al., 2002; Lepicard et al., 2004, Maderich et al., 2014a,b) did not  
70 take into account the benthic food web. Nevertheless the results of simulations still agreed well with observations for the first months and years when transfer from water dominated (Maderich et al., 2014a,b). Measurements following the Fukushima Dai-ichi accident suggest that transfer of radioactivity from bottom deposits through the benthic food web over a prolonged period of time can be an increasingly important factor in the radiological assessment of released radioactivity.

Another relevant case is the significant contamination of the Baltic Sea in 1986 by the deposition of activity originating from the Chernobyl accident. Unlike the coastal sea region near FDNPP, the Baltic Sea is a semi-enclosed relatively shallow sea filled by brackish waters and connected with the ocean by the narrow and shallow Danish Straits (Leppäranta and Myrberg, 2009). Within HELCOM (Helsinki Convention on the Protection of the Marine Environment of the Baltic Sea  
80 Area, [www.helcom.fi](http://www.helcom.fi)) the group MORS (Monitoring of Radioactive Substances) established an internationally agreed monitoring network in 1986 and collected all the data in a common data base (MORS, 2015). Therefore, this event also represents a good test case to validate models (Periáñez et al., 2015).

In this study, an extended food web model is presented that considers both pelagic and benthic  
85 foodchains. This dynamic model was implemented into the compartment model POSEIDON-R and applied to the northwestern Pacific for the period of 1945-2020 to assess the radiological consequences from  $^{137}\text{Cs}$  released as a result of global fallout and the Fukushima Dai-ichi accident. The model was also applied to the Baltic Sea for the period 1945-2020 to show the versatile applicability of this model. The paper is organized as follows. Descriptions of the compartment model and of the  
90 extended dynamic food web model are given in Section 2. Section 3 presents the model application for the Fukushima Dai-ichi accident. The results of the model application to the Baltic Sea are given in Section 4. Section 5 summarizes the findings.



## 2 Model description

To describe transfer pathways of  $^{137}\text{Cs}$  from bottom sediments to marine organisms the dynamic model BURN was extended. The model is based on the approach devised by Heling et al. (2002) in which the marine organisms are grouped into a few classes based on trophic level and types of species. The radionuclides are grouped in several classes in terms of tissues in which a specific radionuclide accumulates preferentially. These simplifications allow for a limited number of standard input parameters. The scheme of transfer of radionuclides through the marine food web is shown in Fig. 1. The different food-chains exist in both pelagic and benthic zones. Pelagic organisms are divided into primary producer (phytoplankton) and consumers: zooplankton, forage (non-piscivorous) fish and piscivorous fish. This food web has been implemented in the compartmental POSEIDON-R model (Lepicard et al., 2004; Maderich et al., 2014 a,b).

The benthic food web includes three primary pathways for radionuclides: (i) through water contamination in a manner similar to the BURN model, (ii) through the vertical detritus flux and zooplankton faeces (Fowler et al., 1987), and (iii) through contaminated bottom sediments. The radionuclides adsorbed on the organic matter in the sediments is bioavailable for benthic organisms but the mineral component of sediments is not (Ueda et al., 1977; Ueda et al., 1978) although Koyanagi et al. (1978) found a rapid and more intensive transfer of several sediment adsorbed radionuclides to particular organs of the demersal fishes. It is assumed that radioactivity is transferred from organic bottom deposits to deposit feeding invertebrates, then to benthic invertebrate feeding demersal fishes, and on to omnivorous bottom predators (Fig. 1). The components of this system also include crustaceans (e.g detritus-feeders), molluscs (filter-feeders), and coastal predators feeding in the whole water column in shallow waters.

In the extended model utilised in this study, the concentration of radioactivity in phytoplankton  $C_1$  is calculated using the Biological Concentration Factor (BCF) approach due to the rapid uptake from water and the short retention time of radioactivity, namely,

$$C_1 = CF_{ph} C_w, \quad (1)$$

where  $C_w$  is concentration of radioactivity in water and  $CF_{ph}$  the BCF for phytoplankton. For the macroalgae, a dynamic model is used to describe radionuclide concentrations due to the longer retention times

$$\frac{dC_5}{dt} = (CF_{ma} C_w - C_5) \ln 2 T_{0.5,5}^{-1}, \quad (2)$$

where  $C_5$  is the concentration of radioactivity in the macro-algae,  $CF_{ma}$  is corresponding BCF,  $T_{0.5,5}$  is the biological half-life of the radionuclide in the plant and  $t$  is the time. The concentration of a given radionuclide in the zooplankton ( $i=2$ ), invertebrates ( $i=6,7,8$ ) and fish ( $i=3,4,9,10,11$ ; see Table 1 for a description of the different fish groups in the model) is described by the following



differential equation:

$$\frac{dC_i}{dt} = a_i K_{f,i} C_{f,i} + b_i K_{w,i} C_w - \ln 2 T_{0.5,i}^{-1} C_i, \quad (3)$$

where  $C_i$  and  $C_{f,i}$  are the concentrations of radioactivity in the marine organism and food, respectively,  $a_i$  is the food extraction coefficient,  $b_i$  is the water extraction coefficient,  $K_{f,i}$  is the food uptake rate,  $K_{w,i}$  is the water uptake rate and  $T_{0.5,i}$  is the biological half-life of the radionuclide in the organism.

The activity concentration in the food of a predator  $C_{f,i}$  is expressed by the following equation, summing up for the total of  $n$  prey types,

$$C_{f,i} = \sum_{j=0}^n C_{prey,j} P_{i,j} \frac{drw_{pred,i}}{drw_{prey,j}}, \quad (4)$$

where  $C_{prey,j}$  is the activity concentration in prey of type  $j$ ,  $P_{i,j}$  is preference for prey of type  $j$ ,  $drw_{pred,i}$  is the dry weight fraction of predator of type of  $i$ , and  $drw_{prey,j}$  is the dry weight fraction of prey of type  $j$ . The index “0” corresponds to the bottom deposit. It is assumed that (i) radioactivity concentration in organic and mineral fractions of bottom deposit are in mutual equilibrium and (ii) that only organic matter in the bottom deposit is bioavailable. Therefore, the concentration of assimilated radioactivity from the organic fraction of bottom sediment can be related with the radioactivity concentration of the upper layer of bulk sediment as  $C_{prey,0} = \phi_{org} \cdot C_s$ . Here  $\phi_{org}$  is an empirical parameter  $\phi_{org} = (1-p)f_{org}C_{org}C_s^{-1}$  where  $p$  is porosity,  $f_{org}$  is the organic matter fraction,  $C_{org}C_s^{-1}$  is the ratio of concentration  $C_{org}$  (Bq kg<sup>-1</sup>-dry) in the organic matter to in the bulk sediment concentration  $C_s$  (Bq kg<sup>-1</sup>-dry). The value of  $\phi_{org}$  is in the range 0.1-0.01 (Ono et al. 2015).

Values of the model parameters are given in Table 1. The parameters for pelagic and benthic food webs were compiled from published data (Baptist and Price, 1962; Cammen, 1980; De Vries and De Vries, 1988; Coughtrey and Thorne, 1983; Tateda, 1994,1997; Vives i Batlle et al., 2007; Tateda et al., 2013; Iwata et al., 2013; Sohtome et al., 2014). The biological half-life data for fish (Baptist and Price, 1962; Coughtrey and Thorne, 1983; Tateda, 1994,1997; Zhang et al., 2001; Matsumoto et al., 2015) show variations in a large range (35-270 days) due to the differences between species and due to the differences in the experiment methodology (Matsumoto et al., 2015). In this generic model, values of  $T_{0.5,i}$  were divided into two groups:  $T_{0.5,i} = 75d$  for non-piscivorous fishes and those demersal fishes feeding on invertebrates ( $i = 3,9$ ) and  $T_{0.5} = 150d$  for predatory fishes ( $i = 4,10,11$ ). This is based on the assumptions that (a) larger fishes have longer  $T_{0.5,i}$  due to the slower metabolic rate (Matsumoto et al., 2015), and (b) predatory fishes are generally larger than prey fishes. The results of sensitivity study for  $T_{0.5,i}$  are given in next section to assess robustness of this simplification. Additional restriction on the values of the model parameters is the condition that at equilibrium state BCF of the components of the food chain should be relevant to the values from IAEA(2004). The values of prey preference are given in Table 2. They are compiled from data on

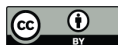

food habits of organisms (Fujita et al., 1995; Kasamatsu and Ishikawa, 1997; Iwata et al., 2013; Sohtome et al., 2014).

It is well known that the uptake of caesium decreases with increasing salinity due to the increase of competing ions from potassium with higher concentration. This was taken into account when introducing the salinity-dependent correction factor  $F_K$  for phytoplankton and macro-algae since caesium enters the foodweb mainly via the lowest trophic level whereas the uptake from water contributes in a relatively minor way (Helting and Bezhenar, 2009). Based on laboratory experiments with marine plants for caesium, the correction factor was verified against field measurements in the Dnieper-Boog Estuary (Helting and Bezhenar, 2011). It is expressed as

$$F_K = \frac{0.05}{\exp(0.73 \ln(K^+/39.1) - 1.22 \cdot 10^3 \Theta^{-1})}, \quad (5)$$

where  $K^+$  is the potassium concentration ( $\text{mg L}^{-1}$ ) and  $\Theta$  is temperature ( $^{\circ}\text{K}$ ). For water with a  $K^+$  concentration of above  $1.5 \text{ mg L}^{-1}$ , the potassium concentration could be linked to the salinity using the following linear relationship (Helting and Bezhenar, 2009):

$$K^+ = 11.6S - 4.28, \quad (6)$$

where  $S$  is the salinity in  $\text{g L}^{-1}$ . Then the BCF for phytoplankton and macro-algae can be expressed by:

$$CF_{ph} = F_K CF_{ph}^*, \quad CF_{ma} = F_K CF_{ma}^*, \quad (7)$$

where  $CF_{ph}^* = 20 \text{ L kg}^{-1}$  and  $CF_{ma}^* = 50 \text{ L kg}^{-1}$  are standard BCFs for marine environments (IAEA, 2004).

According to a review of radiological data (Coughtrey and Thorne, 1983; Yankovich et al., 2010), every radionuclide in fish accumulates mostly in a specific (target) tissue. It is assumed that the target tissue (bone, flesh, organs and stomach) controls the overall elimination rate of the nuclide ( $T_{0.5,i}$ ) in the organism. The radioactivity in the food for the predator is therefore the activity concentration in the target tissue diluted by the remaining body mass of the prey fish, calculated by multiplying the predicted level in the target tissue by its weight fraction. For radiocaesium the target tissue is flesh. To calculate the concentration in the edible part of fish from the calculated levels in the target tissues, a target tissue modifier (TTM) is introduced. This is based on tissue distribution information (Coughtrey and Thorne, 1983; Yankovich et al., 2010). Values of the described parameters for the fish in a dynamic food chain model are given in Table 3.

The dynamic food-chain model is part of the POSEIDON-R (Lepicard et al., 2004; Maderich et al., 2014a,b) compartment model where the marine environment is modelled as a system of compartments representing the water column, bottom sediment and biota. The compartments describing the water column containing suspended matter are subdivided into a number of vertical layers. The model assumes partition of the radionuclides between the dissolved and particulate fractions in the



water column, described by a distribution coefficient. The radionuclide concentration for each compartment is governed by a set of differential equations including the temporal variations of concentration, the exchange with adjacent compartments and with the suspended and bottom sediments, radioactive sources and decay. The exchange between the water column boxes is described by fluxes of radionuclides due to advection, sediment settling and turbulent diffusion processes. The activity loss on suspended sediments occurs through settling in underlying compartments and, finally, to the bottom. A three-layer model describes the transfer of radionuclides in the bottom sediment. The transfer of radioactivity from the upper sediment layer to the water column is described by diffusion in the interstitial water and by bioturbation. Radioactivity in the upper sediment layer migrates downwards by diffusion and by burial at a rate assumed to be the same at which particles settle from the overlying water. The upwards transfer of radioactivity from the middle sediment layer to the top sediment layer occurs only by diffusion. Burial causes an effective loss of radioactivity from the middle to the deep sediment layer, from which no upward migration occurs. The model for the pelagic food web component was implemented for the upper layer of the compartment, whereas the benthic component was included in the shallow one-layer compartments.

The POSEIDON-R model can handle different types of radioactive releases: atmospheric fallout, runoff from land deposited radionuclide by river systems, point sources associated with routine releases from nuclear facilities located either directly on the coast or inland at river systems, and point sources associated with accidental releases (Lepicard et al., 2004). For coastal discharges occurring in the large ('regional') boxes, 'coastal' release boxes are nested into the regional box system. Advection and diffusion of zooplankton are not taken into account due to the short biological half-life (five days), except in the coastal box, where diffusion was considered. It was assumed that crustaceans, molluscs, and fish are not transported by ocean flows. When calculating the radionuclide concentration in fish in small coastal boxes, random fish migration is taken into account as in Maderich et al. (2014a,b). For this purpose, the right hand side of equation (3) for radionuclide concentration in fish, both in the inner ( $C_{in,i}$ ) and outer ( $C_{out,i}$ ) compartments, is extended by the term  $-(C_{in,i} - C_{out,i})/T_{migr,i}$  for the coastal compartment and by the term  $(C_{in,i} - C_{out,i})/(\delta T_{migr,i})$  for the outer compartment. Here  $T_{migr,i}$  is the characteristic time of fish migration from a coastal compartment, depending on compartment scale and fish species, and  $\delta$  is the ratio between the volumes of the outer and the coastal compartments.

### 3 Application to the Fukushima Dai-ichi accident

#### 3.1 Model setup

The model was customized for the northwestern Pacific Ocean, the East China and Yellow Seas and the East/Japan Sea. A total of 176 boxes cover this entire region (Fig. S1). The compartments around the FDNPP are shown in Fig. 2. The coastal box (15x30 km), which is placed around FDNPP, is

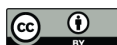

located inside box 90. It was chosen to cover observation data within a circular-shaped surface area with a radius 15 km centred around the FDNPP. The advective and diffusive water fluxes between compartments were based on a ten-year average over the period 2000-2009 using the Regional Ocean Modeling System (ROMS). Details of the customization are given by Maderich et al. (2014a,b). In the simulations the parameters  $\phi_{org}=0.01$  and  $T_{migr,i}=0.7$  y for  $i=3,4,9,10,11$  were used.

The simulation of dispersion and fate of  $^{137}\text{Cs}$  was carried for the period 1945-2010 to provide background concentrations of radiocaesium for the radiological assessment of the FDNPP accident for the period 2011-2020 and to verify the model with available data. The main source of  $^{137}\text{Cs}$  in the northwestern Pacific in the period 1945-2010 was from fallout due to atmospheric nuclear weapon tests. The fallout includes a global component, caused by the transport of radioactivity due to the general atmospheric circulation and subsequent deposition on the surface of the sea and a regional component, caused by fallout from weapon tests carried out in the Marshall Islands, resulting in the contamination of the surface layer of the ocean. The annual deposition of  $^{137}\text{Cs}$  on the ocean for the period 1945-2005, compiled from Nakano (2006) and Hirose et al. (2008), is shown in Fig. S2a. The concentrations of  $^{137}\text{Cs}$  at the eastern and southern boundaries (Fig. S2b) of the computational domain (Fig. S1) were estimated by using both observations from the MARIS (Marine Information System) database (MARIS, 2015), and observations from Kang et al. (1997) and Nakano and Povinec (2003). These values represent both the effect from global deposition of  $^{137}\text{Cs}$  on the northeastern Pacific and the regional effect of weapon tests carried out in the Marshall Islands. For the prediction of the concentration of  $^{137}\text{Cs}$  for the period 2005-2020, five-years-averaged deposition and the boundary concentrations during the period of 2000-2004 were extrapolated and corrected for radioactive decay. The simulation for the period 1945-2010 was continued for the period of 2011-2020 with a source term estimated from the Fukushima accident. It was assumed that the release of activity directly to the ocean took place over the period 1-10 April 2011. Amounts of 5 PBq of  $^{134}\text{Cs}$ , and 4 PBq of  $^{137}\text{Cs}$  were transferred directly into the coastal box. These quantities are in accordance with widely accepted source terms for the Fukushima accident simulations (see Povinec et al., 2013). The atmospheric deposition data was obtained from simulations with the MATCH model (Robertson et al., 1999) where the dispersion of  $^{137}\text{Cs}$  for the period 12 March-5 April was computed (Maderich et al., 2014a). The ECMWF meteorological data with a source term reported by Stohl et al. (2012) was used in the simulation. The amount of deposited  $^{137}\text{Cs}$  in the computational domain was 8.5 PBq. The deposition of  $^{134}\text{Cs}$  was estimated at 10.2 PBq using an activity ratio  $^{134}\text{Cs}/^{137}\text{Cs}=1.2$  (NISA, 2011). The atmospheric deposition was distributed between compartments as shown in Fig.2. The continuous leakage into the coastal box from the middle of 2011 with a release rate of  $3.6 \text{ TBq y}^{-1}$  (Kanda, 2013) was taken into account.





## 265 3.2 Results

The results from the modelling of the  $^{137}\text{Cs}$  concentration in the water and in the upper layer of sediments of the coastal box are shown in Fig. 3. Model results for the water demonstrate good agreement both with yearly averaged observations by MEXT (the Japanese Ministry of Education, Culture, Sports, Science and Technology) for the period 1950-2010 (MEXT, 2010) and with observation by TEPCO (Tokyo Electric Power Company) for the period of 2011-2014 (TEPCO, 2014). Comparison of Fig. 3a with Fig. 9a from Maderich et al. (2014a) confirms that the model correctly simulated the almost constant concentration of  $^{137}\text{Cs}$  in the water in the FDNPP vicinity due to the continued leak of radioactivity from FDNPP (Kanda, 2013). The geometric mean of the simulated-to-observed values is 1.0 for the period 1984-2014 when data were available, with a geometric standard deviation of 1.9 for a total number of observations  $N=48$ . The model also predicts well the concentration of  $^{137}\text{Cs}$  in the bottom sediment before the accident and the sudden increase in concentration by more than five orders magnitude as a result of the accident. However, as seen in Fig. 3b, the observed concentration from 2013 decreases faster than the model prediction without including the correction of vertical transfer. The details of this correction are described below. The estimated decrease constant of the fitted exponential function of the observed sediment concentration for 2012-2014 is  $\lambda_s = 0.44 \text{ y}^{-1}$ . The observed concentrations of  $^{137}\text{Cs}$  in the bottom sediment of the coastal areas (B,C,D) with a depths less than 50 m in the Fukushima Prefecture (Sohtome et al., 2014) show a similar decrease. The decrease constant for area B located north of FDNPP is  $0.44 \text{ y}^{-1}$  whereas for the smaller areas C and D located south of the FDNPP it is  $0.63 \text{ y}^{-1}$  and  $0.7 \text{ y}^{-1}$ , respectively. For the deeper offshore area F adjacent to the areas C and D the value of the decrease constant is much less ( $0.24 \text{ y}^{-1}$ ). Several possible mechanisms could be responsible for the observed time-spatial redistribution of radioactivity in the surface layer of sediment. According to Ambe et al. (2014) the vertical transfer of  $^{137}\text{Cs}$  by resuspension and redeposition by the ocean currents and waves, desorption to the pore water and bioturbation can result in a decrease of  $^{137}\text{Cs}$  concentration in the upper layer of sediments. Resuspension and lateral transport of the fine-grained sediments also can redistribute radiocaesium in the coastal sediment (Otosaka and Kobayashi, 2013). The simplified representation of the exchange processes in the upper layer of the sediment and the lack of re-suspension cannot account for the mechanisms described above. Instead, to take into account the vertical transfer of  $^{137}\text{Cs}$  we added the exchange terms  $(C_{s,1} - C_{s,2})\lambda_s$  and  $-(C_{s,1} - C_{s,2})\lambda_s$  to the right hand side of the equations for the concentration of radioactivity in upper ( $C_{s,1}$ ) and medium ( $C_{s,2}$ ) layers of sediment in the coastal box, respectively. It can be seen that corrected prediction in Fig. 3b is in good agreement with the observations for 2012-2014. The geometric mean of the simulated-to-observed values is 0.93, with a geometric standard deviation of 1.26 for a total number of observations  $N=42$  for the period 1984-2014.

300 The simulated  $^{137}\text{Cs}$  concentrations in deposit feeding invertebrates, demersal fishes, bottom predators and coastal predators in the coastal box are shown in Fig. 4 along with observed con-



centrations by the Japan Fisheries Research Agency (JFRA, 2015). As seen in Fig. 4a, just after the accident the simulated  $^{137}\text{Cs}$  concentration in the deposit feeding invertebrates and the observed concentration in the sea urchin increase due to the high concentration of  $^{137}\text{Cs}$  in the water (Fig. 4a).

305 After that the concentration trend becomes equal to the bottom sediment trend. The decrease constant of the fitted exponential function of simulated concentration (depuration constant) is  $0.45\text{ y}^{-1}$ , which is close to the decrease constant for the sediment observations ( $0.44\text{ y}^{-1}$ ). It agrees with the conclusion by Sohtome et al. (2014) that both observed decrease rates of concentration in sediment and in deposit-feeding benthic invertebrates are almost identical. The predicted transfer coefficient from  
 310 bulk sediment to deposit feeding benthic invertebrates for the period of 2012-2020 is approximately 0.07. Results of observations and rearing experiment for benthic polychaete (Shigenobu et al., 2015) showed that this coefficient was less than 0.1. The geometric mean of the simulated-to-observed values is 0.95, with a geometric standard deviation of 1.43 for a total number of observations  $N=20$ .

The results of simulation of the  $^{137}\text{Cs}$  concentration in the demersal fishes (Fig. 4b) agree well  
 315 with observations documented for several species of flounders. The geometric mean of the simulated-to-observed values is 1.18, with a geometric standard deviation of 1.30 for a total number of observations  $N=47$ . The simulated depuration rate is  $0.46\text{ y}^{-1}$  whereas the experimental value for 2012-2014 is  $0.48\text{ y}^{-1}$ . The gradual decrease of activity in demersal fish caused by the transfer of activity from organic matter deposited in the bottom sediment is similar to observations by Wada et al. (2013). Notice that the predicted transfer coefficient from bulk sediment to demersal fish for the  
 320 period of 2012-2020 is approximately 0.13. This value is larger than that for deposit feeding invertebrates due to the biomagnification effect. Comparison of simulations with observations for a bottom predator (rockfish) in Fig. 4c shows a good agreement. The geometric mean of the simulated-to-observed values is 0.8, with a geometric standard deviation of 1.75 for a total number of observations  
 325  $N=46$ . The comparison of simulated and observed concentrations of  $^{137}\text{Cs}$  in coastal predators is given in Fig. 4d. The open and filled symbols are data for seabass and fat greenling, respectively. The geometric mean of the simulated-to-observed values for coastal predators is 1.19, with a geometric standard deviation of 1.85 for a total number of observations  $N=66$  for the period of 1984-2014. As seen in Fig. 4d, the simulated concentration of  $^{137}\text{Cs}$  in coastal predators feeding on both pelagic and  
 330 benthic organisms is similar to the simulated concentration in pelagic piscivorous fish in the period of 2011-2013, whereas after 2013 the concentration in coastal predators decreases more slowly than in piscivorous fish due to the omnivorous predation diet of coastal predators that includes benthic organisms.

The model output can be sensitive to the model parameters which are known with high uncertainty.  
 335 Therefore, a sensitivity study was carried out for the major benthic food web parameters including the water uptake rate  $K_{w,i}$ , the food uptake rate  $K_{f,i}$ , the biological half-life of  $^{137}\text{Cs}$  in the organism  $T_{0.5}$  and for the concentration ratio of assimilated radioactivity from the organic fraction in bottom sediment to the radioactivity in bulk bottom sediment  $\phi_{org}$ . The effects from variations in these

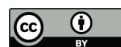

parameters were estimated for the following model output: maximum  $^{137}\text{Cs}$  concentration in the  
 340  $i=2, \dots, 11$  types of organisms in the coastal box after the FDNNP accident. The range for  $K_{w,i}$ ,  $K_{f,i}$ ,  
 $T_{0.5,i}$ , and  $\phi_{org}$  is defined following Keum et al. (2015) as follows: minimum value is half the  
 reference value and maximum value is twice the reference value. The reference values for  $K_{w,i}$ ,  
 $K_{f,i}$ , and  $T_{0.5,i}$  are given in Tables 1 and 2 whereas  $\phi_{org} = 0.01$ . The model output sensitivity was  
 estimated using sensitivity index (SI). It was calculated following Hamby (1994) as

$$345 \quad SI = \frac{D_{max} - D_{min}}{D_{max}}, \quad (8)$$

where  $D_{max}$  and  $D_{min}$  are output values for maximal and minimal values in the parameter range,  
 respectively.

Figure S3a shows that all organisms (except the primary producers) are most sensitive to the vari-  
 ation of  $K_{f,i}$ . Effect of the food uptake rate for zooplankton  $K_{f,2}$  slightly decreases up the pelagic  
 350 food web ( $i = 2, 3$ ), whereas it is much less for the benthic food web ( $i = 7 - 11$ ) because of its  
 diverse diet. The biological half-life for zooplankton  $T_{0.5,i}$  was also one of most sensitive param-  
 eters both for pelagic and benthic food webs (Fig. 3b). The maximum  $^{137}\text{Cs}$  concentrations for  
 zooplankton, non-piscivorous and piscivorous fishes, algae, deposit-feeding invertebrates, molluscs,  
 crustaceans, demersal fish, bottom predators and coastal predators using maximal value of  $T_{0.5,i}$   
 355 were increased by a factor 2.7, 2.4, 2, 1.3, 1, 1.3, 1.9, 1.1, 1.3, and 1.7, respectively, compared with a  
 case when a minimum values of  $T_{0.5,i}$  was used. The biological half-life  $T_{0.5,6}$  of deposit feeding  
 invertebrates essentially influences  $^{137}\text{Cs}$  concentration in demersal fish ( $i = 9$ ). Figure S3c shows  
 that the effect of variations in the water uptake rate of zooplankton  $K_{w,2}$  decreased for organisms of  
 higher trophic levels, showing good agreement with results by Keum et al. (2015). The concentra-  
 360 tions of  $^{137}\text{Cs}$  in algae and deposit-feeding invertebrates are found to be three times more sensitive  
 to the variations in water uptake than in the rest of organisms. The benthic organisms were less  
 sensitive to the parameter  $\phi_{org}$  (Fig. 3d).

To estimate the contribution of benthic organisms in the individual ingestion dose rate due to  
 the consumption of contaminated marine products, a hypothetical reference group is considered. It  
 365 is assumed that this reference group is located in the Fukushima region and consumes only ma-  
 rine products from the coastal compartment near the Fukushima NPP. According to data given by  
 Povinec et al. (2013), the annual consumption of marine products in Japan is 23.4 kg of fish, 2 kg  
 of crustaceans, 1.3 kg of molluscs, and 3.7 kg of macro-algae. We compare two cases assuming  
 that the consumed fish are pelagic or benthic species. In the first case consumption of piscivorous  
 370 and non piscivorous species are equal. In the second case consumption of each of the three species  
 of fish (demersal fish, bottom predator and coastal predator) is 1/3. In both cases we consider the  
 period of 2014–2020 because the simulated and observed radiocaesium concentration in fish for  
 2011–2013 exceeds the Japanese regulatory level of seafood safety ( $100 \text{ Bq kg}^{-1}$ ) for Fukushima  
 offshore waters (Fig.4). In the first case the fish consumption is equally divided between piscivorous  
 375 and non piscivorous species. The dose contributions of the two caesium-isotopes  $^{134}\text{Cs}$  and  $^{137}\text{Cs}$



for the period of 2014-2020 are  $1.4 \mu\text{Sv}$  and  $6.3 \mu\text{Sv}$ , respectively. In the second case the consumption of each of the three species (demersal fish, bottom predator and coastal predator) is 1/3 from 23.4 kg. The corresponding dose contributions are  $29 \mu\text{Sv}$  and  $56 \mu\text{Sv}$ , respectively. The total dose for consumed marine products including pelagic fish ( $7.7 \mu\text{Sv}$ ) is one order smaller than for marine products including benthic fish ( $85 \mu\text{Sv}$ ) but both of them are much less than the maximum annual effective dose commitment for the public, equal to  $1000 \mu\text{Sv}$  according to IAEA regulations (IAEA, 2014). Notice that we considered a conservative scenario with a continuous leak of radiocaesium from FDNPP in the period of 2012-2020, whereas ending of this leak results in a return of  $^{137}\text{Cs}$  concentration to background value within one year (Maderich et al., 2014a).

## 385 4 Modelling the effects from the Chernobyl accident on marine organisms in the Baltic Sea

### 4.1 Model setup

The model was customized for the Baltic Sea, the North Sea, and the North Atlantic Ocean. The box system contains a total of 81 regional boxes followed by an additional 16 boxes for the inflow from rivers into the Baltic Sea. A plot of the box system is shown in Fig. 5. The volume and average depth for the 47 boxes describing the Baltic Sea are derived from bathymetric data. A water column with a depth of more than 60 m is divided into two layers (surface and bottom) to allow for activity stratification in the water column. These multi-layered boxes are marked blue in Fig. 5. The exchange of water between the boxes in the Baltic Sea is based on a ten year average (1991-2000) of three-dimensional currents from reanalysis based on the Swedish Meteorological and Hydrological Institute (SMHI) model (SMHI, 2013). The exchange rates for the remainder of the boxes were adopted from the standard POSEIDON configuration (Lepicard et al., 2004). To consider the water balance of the Baltic Sea and the inflow of radioactivity from river runoff, an additional 16 boxes were defined to represent main rivers in the basin. The inflow of river water for each box is based on information reported by Leppäranta and Myrberg (2009). The total inflow of water into the rivers accumulates to  $484 \text{ km}^3 \text{ y}^{-1}$ . A concentration of suspended sediments (different for each box) was calculated by a 3D hydrodynamic THREEOX model (Margvelashvily et al., 1997; Maderich et al., 2008). The bottom sediment classes for simulation were determined using data from Winterhalter et al. (1981). The simulation of transport and fate of  $^{137}\text{Cs}$  in the Baltic Sea was carried out for the period 1945-2020. The main sources of  $^{137}\text{Cs}$  as included in this model are: global deposition from weapon testing and from the Chernobyl accident (HELCOM, 1995), release from the Sellafield and La Hague reprocessing plants (HELCOM, 2009), regional deposition from the Chernobyl accident in May 1986 (HELCOM, 1995), and river runoff. Details of these main sources are shown in Fig. S4a (global deposition), and in Fig. S4b (Sellafield and La Hague releases), as well as in Table S1 (Chernobyl accident). The river runoff from corresponding catchments was calculated using a generic model by Smith et al. (2004). The value for parameter  $\phi_{org}$  is 0.02.



## 4.2 Results

The simulation results for the period of 1945-2020 are shown in Fig. 6-7 for box 45 where data for concentration in the water, in the sediment and in the biota are most detailed (MARIS, 2015; MORS, 2015). Time variations of  $^{137}\text{Cs}$  concentration in the water and sediments in Fig. 6 show two maxima related with weapon testing and the Chernobyl accident and then with a decreasing tendency due to outflow to the North Sea and radioactive decay. The decrease constants of the fitted exponential function of the simulated concentration in the water ( $0.081\text{ y}^{-1}$ ) and sediments ( $0.070\text{ y}^{-1}$ ) are close unlike the Fukushima accident where the plume of contaminated water quickly dissolves in open ocean. The simulation results are in good agreement with the measurements. The geometric mean ratios between the predicted and observed values for concentration in the water and sediment are 0.89 and 0.86, respectively. The geometric standard deviation for concentration in the water is of 1.42 for a total number of observations  $N=378$ , whereas corresponding value for concentration in the sediment is of 2.17 for a total number of observations  $N=163$  in the whole Baltic Sea.

Figure 7 shows a comparison between the calculated and observed  $^{137}\text{Cs}$  concentration in marine organisms for box 45. Comparison of the calculated concentrations of  $^{137}\text{Cs}$  in the deposit-feeding invertebrates with the measurements (Fig. 7a) shows that the model correctly predicts the time-varying concentration in these organisms. The assessment of the model accuracy in this case is, however, hardly possible because of the small number of measurements. Calculated and observed concentrations of  $^{137}\text{Cs}$  in pelagic non-piscivorous fish (sprat) demonstrate a good agreement with the measurements (Fig. 7b). The geometric mean ratio for the simulated-to-observed values is 0.91 with a geometric standard deviation of 1.32 for a total number of observations  $N = 24$  in the whole Baltic Sea. Using the standard model with a constant value of  $CF_{ph}$  (IAEA, 2004) for brackish waters leads to an essential underestimation of the concentration in fish: the geometric mean value is 0.68 with a geometric standard deviation of 1.33. Comparison of calculated and observed concentrations of  $^{137}\text{Cs}$  in demersal fish (European flounder) is shown in Fig. 7c. It can be seen that the concentration of  $^{137}\text{Cs}$  in demersal fish reveals a pattern with significantly more delay in time compared with that in the non-piscivorous fish (Fig. 7b) due to the difference in the food chain between these species (Fig. 1). The benthic food web depends on the  $^{137}\text{Cs}$  concentration in the bottom sediment (Fig. 6b), which follows the  $^{137}\text{Cs}$  concentration in water with some delay (Fig. 6a). Notice that European flounder belongs to the polychaete and small crustacean feeding group (Gibson et al., 2015). The geometric mean ratio for the simulated-to-observed values is 0.92 with a geometric standard deviation of 1.67 for a total number of observations  $N=70$  in the whole Baltic Sea. Calculated and observed  $^{137}\text{Cs}$  concentration in the coastal predator (cod) also agree well with the measurements (Fig. 7d): the geometric mean ratio for the simulated-to-observed values is 0.91 with a geometric standard deviation of 1.37 for a total number of observations  $N=95$  in the whole Baltic Sea. The concentration of  $^{137}\text{Cs}$  in the coastal predators is greater than in piscivorous fish due to the additional benthic food chain included in the web (Fig. 7d). In contrast to the open Pacific Ocean



coast where the FDNPP is located, concentrations in demersal fish, pelagic and coastal predators after the Chernobyl accident decrease with almost the same rate (about  $0.075 \text{ y}^{-1}$ ). The variation in decrease rate is approximately 10% with a decrease rate  $0.081 \text{ y}^{-1}$  for water and  $0.07 \text{ y}^{-1}$  for sediment. The weak water exchange with the North Sea of the semi-enclosed Baltic Sea results in a slow evolution of water-sediments-biota system in quasi-equilibrium state. Notice that the food-web model parameters, except for the correction for brackish waters, are the same as for the FDNPP case study demonstrating generic character of the model.

## 5 Conclusions

A generic dynamic food web model was extended to include the benthic food chain. In the model pelagic organisms are grouped into phytoplankton, zooplankton, non-piscivorous fish and piscivorous fish (Heling et al., 2002). The benthic organisms are grouped into deposit feeding invertebrate, demersal fish, and bottom predators. The components of this system also include crustaceans, molluscs and coastal predators. The model takes into account the salinity effect on the intake of radio-caesium. The foodweb model is embedded into the POSEIDON-R compartment model (Lepicard et al., 2004; Maderich et al., 2014a,b) where the marine environment is modelled as a system of compartments comprising the water column, bottom sediment and biota. The compartment model was applied to two regions (north western Pacific and the Baltic Sea) that were strongly contaminated due to accidents on the Fukushima Dai-ichi and Chernobyl NPPs. Results of simulations were compared with available data for the period of 1945-2015. The modeling confirmed the presence of a continuous leakage of  $^{137}\text{Cs}$  from Fukushima Dai-ichi NPP with a rate of  $3.6 \text{ TBq y}^{-1}$  from 2012 resulting in an almost constant concentration of  $^{137}\text{Cs}$  in an area of  $15 \times 30 \text{ km}$  around the NPP. The decrease rate for the simulated concentration in the deposit ingesting invertebrates ( $0.45 \text{ y}^{-1}$ ) is close to the decrease rate for the sediment concentration ( $0.44 \text{ y}^{-1}$ ) found experimentally. This is due to a diverse diet of invertebrates, and this is conformed with the conclusions by Sohtome et al. (2014) that the decrease of observed concentration in sediment and deposit-feeding benthic invertebrates is almost identical. The predicted-by-model low (0.07) transfer coefficient of radio-caesium from bulk sediment to deposit-feeding benthic invertebrates in the area around the FDNPP for the period of 2012-2020 is consistent with observations and rearing experiments (Shigenobu et al., 2015). The findings are comparable with observations by Wada et al. (2013) showing a gradual decrease of activity in the demersal fish (decrease constant is  $0.46 \text{ y}^{-1}$ ) caused by transfer of activity from organic matter deposited in bottom sediment through the deposit feeding invertebrates. The estimated model transfer coefficient from bulk sediment to demersal fish for the period of 2012-2020 (0.13) is larger than that for deposit feeding invertebrates due to the biomagnification effect. This value can be used for mapping of demersal fish contamination from the bottom sediments. The concentration in coastal predators that feed on both pelagic and benthic organisms is similar to the concentration in pelagic



piscivorous fish for the period of 2011-2013 when effects of water contamination were dominant. After 2013 the concentration in coastal predators decreases slower than in piscivorous fish due to the omnivorous predation diet of coastal predator that includes benthic organisms.

The total individual dose of a reference group for consumed marine products including only pelagic fish contaminated by two caesium-isotopes  $^{134}\text{Cs}$  and  $^{137}\text{Cs}$  from a coastal compartment in the period 2014-2020 is  $1.4\ \mu\text{Sv}$  and  $6.3\ \mu\text{Sv}$ , respectively. The total dose contribution for marine products including pelagic and benthic fish of the two caesium-isotopes  $^{134}\text{Cs}$  and  $^{137}\text{Cs}$  for the same period are  $29\ \mu\text{Sv}$  and  $56\ \mu\text{Sv}$ , respectively. The total dose for consumed marine products from pelagic fish ( $7.7\ \mu\text{Sv}$ ) is one order smaller than when including pelagic and benthic fishes ( $85\ \mu\text{Sv}$ ) but both of them are much less than the maximum annual effective dose commitment for the public, equal to  $1000\ \mu\text{Sv}$  according to IAEA regulations (IAEA, 2014).

The results of the application of POSEIDON-R with an extended dynamic model to the Baltic Sea which is semi-enclosed and filled by brackish waters are in good agreement with available measurements in the Baltic Sea. Unlike the off coast processes in the Pacific Ocean where the FDNPP is located, weak water exchange with the North Sea results in slow quasi-equilibrium evolution of water-sediments-biota system. The obtained results demonstrate the importance of the benthic food chain in the long-term transfer of  $^{137}\text{Cs}$  from contaminated bottom sediments to marine organisms and the potential of a generic model for use in different regions of the World Ocean.

*Acknowledgements.* This work was supported by KIOST major project (PE99304), CKJORC (China-Korea Joint Ocean Research Center) Project for Nuclear Safety, FP7-Fission-2012 project PREPARE "Innovative integrative tools and platforms to be prepared for radiological emergencies and post-accident response in Europe" and it is in frame of IAEA MODARIA Programme "Modelling and data for radiological impact assessments".

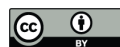

## 505 References

- Ambe, D., Kaeriyama, H., Shigenobu, Y., Fujimoto, K., Ono, T., Sawada, H., Saito, H., Miki, S., Setou, T., Morita, T. and Watanabe, T.: A high-resolved spatial distribution of radiocesium in sea sediment derived from Fukushima Dai-ichi Nuclear Power Plant, *J. Environ. Radioactivity*, 133, 264-275, 2014.
- Baptist, J.P. and Price, T.J.: Accumulation and retention of Cesium 137 by marine fishes, *Fishery Bull.*, 206, 62, 177-187, 1962.
- Black, E. E. and Buesseler, K. O.: Spatial variability and the fate of cesium in coastal sediments near Fukushima, Japan, *Biogeosciences*, 11, 5123-5137, doi:10.5194/bg-11-5123-2014, 2014.
- Buesseler, K.O., Jayne, S.R., Fisher, N.S., Rypina, I.I., Baumann, H., Baumann, Z., Breier, C.F., Douglass, E.M., George, J., Macdonald, A.M., Miyamoto, H., Nishikawa, J., Pike, S.M. and Yoshida, S.: Fukushima-derived radionuclides in the ocean and biota off Japan, *Proc. Natl. Acad. Sci. U. S. A.*, 109, 5984-5988, 2012.
- Cammen L. M.: Ingestion rate: An empirical model for aquatic deposit feeders and detritivores. *Oecologia*, 44, 303-310, 1980.
- Coughtrey, P.J. and Thorne, M.C. Radionuclide distribution and transport in terrestrial and aquatic ecosystems: A critical review of data, vol 2, A. A. Balkema, Rotterdam, 1983.
- 520 Fowler, S.W., Buat-Menard, P., Yokoyama, Y., Ballestra, S., Holm, E. and Nguyen, H.V. Rapid removal of Chernobyl fallout from Mediterranean surface waters by biological activity, *Nature*, 329, 56-58, 1987.
- Fujita, T., Kitagawa, D., Okuyama, Y., Ishito, Y., Inada, T. and Jin Y. Diets of the demersal fishes on the shelf off Iwate, northern Japan, *Mar. Biol.*, 123, 219-233, 1995.
- Gibson, R. N., Nash, R. D. M. Geffen, A. J., and Van der Veer, H. W. (eds.): Flatfishes: biology and exploitation. - Second edition Wiley-Blackwell, Chichester, UK, 2015.
- 525 Hamby, D. M. A review of techniques for parameter sensitivity analysis of environmental models. *Environmental Monitoring and Assessment*, 32, 135-154, 1994.
- HELCOM (Helsinki Convention on the Protection of the Marine Environment of the Baltic Sea Area): Radioactivity in the Baltic Sea 1984-1991, *Balt. Sea Environ. Proc. No. 61*, 182 pp, 1995.
- 530 HELCOM: Radioactivity in the Baltic Sea 1999-2006. *Balt. Sea Environ. Proc. No. 117*, 64 pp, 2009.
- Heling, R., Koziy, L., and Bulgakov, V.: On the dynamical uptake model developed for the uptake of radionuclides in marine organisms for the POSEIDON-R model system, *Radioprotection*, 37, C1, 833-838, 2002.
- Heling, R. and Bezhenar, R.: Modification of the dynamic radionuclide uptake model BURN by salinity driven transfer parameters for the marine foodweb and its integration in POSEIDON-R, *Radioprotection*, 44, 741-6, 2009.
- 535 Heling, R. and Bezhenar, R.: The validation of the dynamic food chain model BURN-POSEIDON on Cs-137 and Sr-90 data of the Dnieper-Bug Estuary, Ukraine, *Radioprotection*, 46, 561-566, 2011.
- Hirose, K., Igarashi, Y. and Aoyama, M.: Analysis of the 50-year records of the atmospheric deposition of long-lived radionuclides in Japan, *Applied Radiation and Isotopes*, 66, 1675-1678, 2008.
- 540 IAEA (International Atomic Energy Agency): Sediment distribution coefficients and concentration factors for biota in the marine environment, Technical Report Series No 422, IAEA, Vienna, Austria, 2004.
- IAEA: Radiation protection and safety of radiation sources : international basic safety standards. IAEA Safety Standards Series No. GSR Part 3, IAEA, Vienna, Austria, 2014.





- Iwata, K., Tagami, K. and Uchida, S.: Ecological half-lives of radiocesium in 16 species in marine biota after the TEPCO Fukushima Daiichi Nuclear Power Plant accident, *Environ. Sci. Technol.* 47, 7696-7703, 2013.
- JFRA (Japan Fisheries Research Agency): Results of the inspection on radioactivity materials in fisheries products, 2015. Available at <http://www.jfa.maff.go.jp/e/inspection/index.html>
- Kanda, J.: Continuing  $^{137}\text{Cs}$  release to the sea from the Fukushima Dai-ichi Nuclear Power Plant through 2012, *Biogeosciences*, 10, 6107-6113, 2013.
- Kang, D.-J., Chung, C.S., Kim, S.H., Kim, K.-R. and Hong, G.H.: Distribution of  $^{137}\text{Cs}$  and  $^{239,240}\text{Pu}$  in the surface waters of the East Sea (Sea of Japan), *Marine Pollution Bulletin* 35, 305-312, 1997.
- Kasamatsu, F. and Ishikawa, Y.: Natural variation of radionuclide  $^{137}\text{Cs}$  concentration in marine organisms with special reference to the effect of food habits and trophic level, *Mar. Ecol. Prog. Ser.*, 160, 109-120, 1997.
- Keum, D.-K., Jun, I., Kim, B.-H., Lim, K.-M. and Choi, Y.-H.: A dynamic model to estimate the activity concentration and whole body dose rate of marine biota as consequences of a nuclear accident, *J. Environ. Radioactivity*, 140, 84-94, 2015.
- Kim, Y., Cho, S., Kang, H.D., Kim, W., Lee, H.R., Doh, S.H., Kim, K., Yun, S.G., Kim, D.S. and Jeong, G.Y.: Radiocesium reaction with illite and organic matter in marine sediment, *Mar. Pollut. Bull.*, 52, 659-665, 2006.
- Koyanagi, T., Nakahara, M. and Iimura, M.: Absorption of sediment-bound radionuclides through the digestive tract of marine demersal fishes, *J. Radiat. Res.*, 19, 295-305, 1978.
- Kusakabe, M., Oikawa, S., Takata, H. and Misonoo, J.: Spatiotemporal distributions of Fukushima-derived radionuclides in nearby marine surface sediments, *Biogeoscience*, 10, 5019-5030, 2013.
- Lepicard, S., Heling, R. and Maderich, V.: POSEIDON-R/RODOS models for radiological assessment of marine environment after accidental releases: application to coastal areas of the Baltic, Black and North Seas, *J. Environ. Radioactivity*, 72, 153-161, 2004.
- Leppäranta, M. and Myrberg, R.: *Physical Oceanography of the Baltic Sea*, Praxis Publishing Ltd, Chichester, UK, 2009.
- Maderich, V., Heling, R., Bezhenar, R., Brovchenko, I., Jenner, H., Koshebutskyy, V., Kusch, A. and Terletskaya, K. Development and application of 3D numerical model THREEETOX to the prediction of cooling water transport and mixing in the inland and coastal waters, *Hydrological Processes*, 22, 1000-1013, 2008.
- Maderich, V., Bezhenar, R., Heling, R., de With, G., Jung, K.T., Myoung, J.G., Cho, Y.-K., Qiao, F. and Robertson, L. Regional long-term model of radioactivity dispersion and fate in the Northwestern Pacific and adjacent seas: application to the Fukushima Dai-ichi accident, *J. Environ. Radioactivity*, 131, 4-18, 2014a.
- Maderich, V., Jung, K.T., Bezhenar, R., de With, G., Qiao, F., Casacuberta, N., Masque, P., Kim, Y.H. Dispersion and fate of  $^{90}\text{Sr}$  in the Northwestern Pacific and adjacent seas: global fallout and the Fukushima Dai-ichi accident, *Sci. Total Environ.*, 494-495, 261-271, 2014b.
- Margvelashvili, N., Maderich, V. and Zheleznyak, M. THREEETOX - computer code to simulate three-dimensional dispersion of radionuclides in homogeneous and stratified water bodies, *Radiation Protection Dosimetry*, 73, 177-180, 1997.
- Matsumoto, A., Shigeoka, Y., Arakawa, H., Hirakawa, N., Morioka, Y. and Mizuno, T. Biological half-life of radioactive cesium in Japanese rockfish *Sebastes cheni* contaminated by the Fukushima Daiichi nuclear power plant accident, *J. Environ. Radioactivity*, 150, 68-74, 2015.



- MARIS (Marine Information System) 2015. Data available at <http://maris.iaea.org/>
- 585 MEXT (Japanese Ministry of Education, Culture, Sports, Science and Technology) Environmental radiation database, 2013. Available at <http://search.kankyo-hoshano.go.jp/servlet/search.top>
- MORS (Monitoring of Radioactive Substances). HELCOM MORS database. Available at <http://www.helcom.fi/Pages/MORS-Discharge-database.aspx>, 2015.
- Nakano, M.: Simulation of the advection-diffusion-scavenging processes for  $^{137}\text{Cs}$  and  $^{239,240}\text{Pu}$  in the Japan  
590 Sea, *Radioactivity in the Environment*, 8, 433-448, 2006.
- Nakano, M. and Povinec, P.P.: Oceanic general circulation model for the assessment of the distribution of  $^{137}\text{Cs}$  in the world ocean, *Deep-sea Res.*, II, 50, 2803-2816, 2003.
- Nakano M. and Povinec P.P.: Long-term simulations of the  $^{137}\text{Cs}$  dispersion from the Fukushima accident in the world ocean, *J. Environ. Radioactivity*, 111, 109-115, 2012.
- 595 NISA (Nuclear and Industrial Safety Agency): Regarding the Evaluation of the Conditions on Reactor Cores of Unit 1, 2 and 3 Related to the Accident at Fukushima Dai-ichi Nuclear Power Station. Tokyo Electric Power Co. Inc. 2011. Available at: <http://www.nsr.go.jp/archive/nisa/english/press/2011/06/en20110615-5.pdf>
- Ono, T., Ambe D., Kaeriyama H., Shigenobu Y., Fujimoto K., Sogame, K., Nishiura N., Fujikawa, T., Morita T. and Watanabe T. Concentration of  $^{134}\text{Cs}$ + $^{137}\text{Cs}$  bonded to the organic fraction of sediments offshore  
600 Fukushima, Japan. *Geochem. J.*, 49, 219-227, 2015.
- Otosaka, S. and Kobayashi, T.: Sedimentation and remobilization of radiocesium in the coastal area of Ibaraki, 70 km south of the Fukushima Dai-ichi Nuclear Power Plant, *Environ. Monit. Assess.*, 185, 5419-5433, 2013.
- Periañez R., Bezhenar R., Iosjpe M., Maderich V., Nies H., Osvath I., Outola I. and de With G.: A comparison  
605 of marine radionuclide dispersion models for the Baltic Sea in the frame of IAEA MODARIA program. *J. Environ. Radioactivity*, 139, 66-77, 2015.
- Povinec, P., Hirose, K. and Aoyama, M.: Fukushima accident: Radioactivity impact on the environment, Elsevier, 2013.
- Robertson, L., Langner, J. and Engardt. M.: An Eulerian limited-area atmospheric transport model. *J. Appl. Meteor.* 38, 190-210, 1999.
- 610 Shigenobu, Y., Ambe, D., Kaeriyama, H., Sohtome, T., Mizuno, T., Koshiishi, Y., Yamasaki, S. and Ono T.: Investigation of radiocesium translation from contaminated sediment to benthic organisms. in: *Impacts of the Fukushima Nuclear Accident on Fish and Fishing Grounds*, Chapter 7 (Nakata, K., Sugisaka H. Eds.), Springer, Tokyo, 91-98, 2015.
- 615 SMHI (Swedish Meteorological and Hydrological Institute) Unpublished data from modelling of the Baltic Sea circulation, 2013.
- Smith, J.T., Wright, S.M., Cross, M.A., Monte, L., Kudelsky, A.V., Saxen, R., Vakulovsky, S.M. and Timms, D.N.: Global analysis of the riverine transport of  $^{90}\text{Sr}$  and  $^{137}\text{Cs}$ , *Environ. Sci. Technol.*, 38, 850-857, 2004.
- Sohtome, T., Wada, T., Mizuno, T., Nemoto, Y., Igarashi, S., Nishimune, A., Aono, T., Ito, Y., Kanda, J. and  
620 Ishimaru, T.: Radiological impact of TEPCO's Fukushima Dai-ichi Nuclear Power Plant accident on invertebrates in the coastal benthic food web, *J. Environ. Radioactivity*, 138, 106-115, 2014.
- Stohl A., Seibert P., Wotawa G., Arnold D., Burkhardt J.F., Eckhardt S., Tapia C., Vargas A. and Yasunari T.J.: Xenon-133 and caesium- $^{137}$  releases into the atmosphere from the Fukushima Dai-ichi nuclear power plant:



- determination of the source term, atmospheric dispersion, and deposition, *Atmos. Chem. Phys.*, 12, 2313-2343, 2012.
- 625 Tateda, Y.: Development of Basic Model for Dynamic Prediction of  $^{137}\text{Cs}$  Concentration in Marine Organism. Abiko Research Laboratory CRIEPI Report No. 94056, CRIEPI, Chiba, p. 57, 1994.
- Tateda, Y.: Basic Model for the Prediction of  $^{137}\text{Cs}$  Concentration in the Organisms of Detritus Food Chain. Abiko Research Laboratory CRIEPI Report. No. 94056, CRIEPI, Chiba, 1997.
- 630 Tateda, Y., Tsumune, D. and Tsubono, T.: Simulation of radioactive cesium transfer in the southern Fukushima coastal biota using a dynamic food chain transfer model. *J. Environ. Radioactivity* 124, 1-12, 2013.
- Tateda Y., Tsumunem D., Tsubono T., Aono T., Kanda J. and Ishimaru T. Radiocesium biokinetics in olive flounder inhabiting the Fukushima accident-affected Pacific coastal waters of eastern Japan. *J. Environ. Radioactivity* 147, 130-141, 2015a.
- 635 Tateda, Y., Tsumune, D., Tsubono, T., Misumi, K., Misumi, K., Masatoshi, Y., Jota, K. and Ishimaru, T. Status of  $^{137}\text{Cs}$  contamination in marine biota along the Pacific coast of eastern Japan derived from a dynamic biological model two years simulation following the Fukushima accident. *J. Environ. Radioactivity*, in press, 2015b, doi:10.1016/j.jenvrad.2015.05.013.
- TEPCO (Tokyo Electric Power Company): Current situation of Fukushima Daiichi and Daini nuclear power station. 2014. <http://www.tepco.co.jp/en/nu/fukushima-np/index-e.html>.
- 640 Vives i Batlle, J., Wilson, R.C. and McDonald, P.: Allometric methodology for the calculation of biokinetic parameters for marine biota, *Sci. Total Environ.*, 388, 256-269, 2007.
- Vives i Batlle, J.: Dynamic modelling of radionuclide uptake by marine biota: application to the Fukushima nuclear power plant accident, *J. Environ. Radioactivity*, 2015a.
- 645 Vives i Batlle, J., Beresford, N.A., Beaugelin-Seiller, K., Bezhenar, R., Brown, J., Cheng, J.-J., Čujić, M., Dragović, S., Duffa, C., Fiévet, B., Hosseini, A., Jung, K.T., Kamboj, S., Keum, D.-K., Kobayashi, T., Kryshev, A., LePoire, D., Maderich, V., Min, B.-I., Periañez, R., Sazykina, T., Suh, K.-S., Yu, C., Wang, C. and Heling, R.: Inter-comparison of dynamic models for radionuclide transfer to marine biota in a Fukushima accident scenario, *J. Environ. Radioactivity*, (accepted), 2015b.
- 650 Ueda, T., Nakamura, R., Suzuki, Y., Comparison of influences of sediments and seawater on accumulation of radionuclides by worms, *J. Radiat. Res.* 18, 84-92, 1977.
- Ueda, T., Nakamura, R. and Suzuki, Y.: Comparison of influences of sediments and seawater on accumulation of radionuclides by marine organisms, *J. Radiat. Res.* 19, 93-99, 1978.
- Wada, T., Nemoto, Y., Shimamura, S., Fujita, T., Mizuno, T., Sohtome, T., Kamiyama, K., Morita, T. and Igarashi, S.: Effects of the nuclear disaster on marine products in Fukushima, *J. Environ. Radioactivity*, 124, 246-254, 2013.
- Winterhalter, B., Floden, T., Axberg, S., Niemisto, L.: Chapter 1. Geology of the Baltic Sea. In: Voipio A. (Editor) *The Baltic Sea*. Elsevier Oceanography Series, 30, 1-418, 1981.
- Yankovich, T., Beresford, N., Wood, M., Aono, T., Anderson, P., Barnett, C.L., Bennett, P., Brown, J.E., Fesenko, S., Fesenko, J., Hosseini, A., Howard, B.J., Johansen, P., Phaneuf, M.M., Tagami, K., Takata, H., Twining, J.R. and Uchida, S.: Whole-body to tissue-specific concentration ratios for use in biota dose assessments for animals, *Radiation Environ. Biophysics*, 49, 549-565, 2010.



Zhao, X., Wang, W., Yu, K., Lam, P.: Biomagnification of radiocesium in a marine piscivorous fish. *Mar. Ecol. Prog. Ser.* 222, 227-237, 2001.

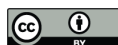

**Table 1.** Parameters of dynamical food chain model.

| $i$ | Organism                     | $d_{rw}$ | $K_{f,i}$       | $a_i$ | $K_{w,i}$                               | $b_i$ | $T_{0.5,i}$ |
|-----|------------------------------|----------|-----------------|-------|-----------------------------------------|-------|-------------|
|     |                              |          | $\text{d}^{-1}$ |       | $\text{m}^3\text{kg}^{-1}\text{d}^{-1}$ |       | $\text{d}$  |
| 1   | Phytoplankton                | 0.1      |                 |       |                                         |       |             |
| 2   | Zooplankton                  | 0.1      | 1.0             | 0.2   | 1.5                                     | 0.001 | 5           |
| 3   | Non-piscivorous fish         | 0.25     | 0.03            | 0.5   | 0.1                                     | 0.001 | Table 3     |
| 4   | Piscivorous fish             | 0.3      | 0.007           | 0.7   | 0.075                                   | 0.001 | Table 3     |
| 5   | Macroalgae                   | 0.1      |                 |       | 0.6                                     | 0.001 | 60          |
| 6   | Deposit feeding invertebrate | 0.1      | 0.02            | 0.3   | 0.1                                     | 0.001 | 15          |
| 7   | Mollusc                      | 0.1      | 0.06            | 0.5   | 0.15                                    | 0.001 | 50          |
| 8   | Crustacean                   | 0.1      | 0.015           | 0.5   | 0.1                                     | 0.001 | 100         |
| 9   | Demersal fish                | 0.25     | 0.007           | 0.5   | 0.05                                    | 0.001 | Table 3     |
| 10  | Bottom predator              | 0.3      | 0.007           | 0.7   | 0.05                                    | 0.001 | Table 3     |
| 11  | Coastal predator             | 0.3      | 0.007           | 0.7   | 0.075                                   | 0.001 | Table 3     |



**Table 2.** Preference of predator of type  $i$  for prey of type  $j$ .

| Predator | 2   | 3   | 4   | 6   | 7   | 8   | 9   | 10  | 11   |
|----------|-----|-----|-----|-----|-----|-----|-----|-----|------|
| Prey     |     |     |     |     |     |     |     |     |      |
| 0        |     |     |     | 0.5 |     |     | 0.1 |     |      |
| 1        | 1.0 |     |     |     | 0.6 | 0.1 |     |     |      |
| 2        |     | 1.0 |     |     | 0.2 | 0.8 |     |     |      |
| 3        |     |     | 1.0 |     |     |     |     |     | 0.2  |
| 5        |     |     |     | 0.5 | 0.2 | 0.1 |     |     |      |
| 6        |     |     |     |     |     |     | 0.7 | 0.3 | 0.25 |
| 7        |     |     |     |     |     |     | 0.1 | 0.2 | 0.1  |
| 8        |     |     |     |     |     |     | 0.1 | 0.2 | 0.2  |
| 9        |     |     |     |     |     |     |     | 0.3 | 0.25 |



**Table 3.** Parameters for the fish in dynamical food chain model.

| Target tissue                                              | Bone | Flesh | Organs | Stomach |
|------------------------------------------------------------|------|-------|--------|---------|
| Weight fraction                                            | 0.12 | 0.80  | 0.05   | 0.03    |
| Target tissue modifier                                     | 0.5  | 1.0   | 0.5    | 0.5     |
| Biological half-life of non-piscivorous fish (d)           | 500  | 75    | 20     | 3       |
| Biological half-life of piscivorous fish (d)               | 1000 | 150   | 40     | 5       |
| Biological half-life of demersal fish (d)                  | 500  | 75    | 20     | 3       |
| Biological half-life of bottom predator fish (d)           | 1000 | 150   | 40     | 5       |
| Biological half-life of coastal predator fish (d) fish (d) | 1000 | 150   | 40     | 5       |

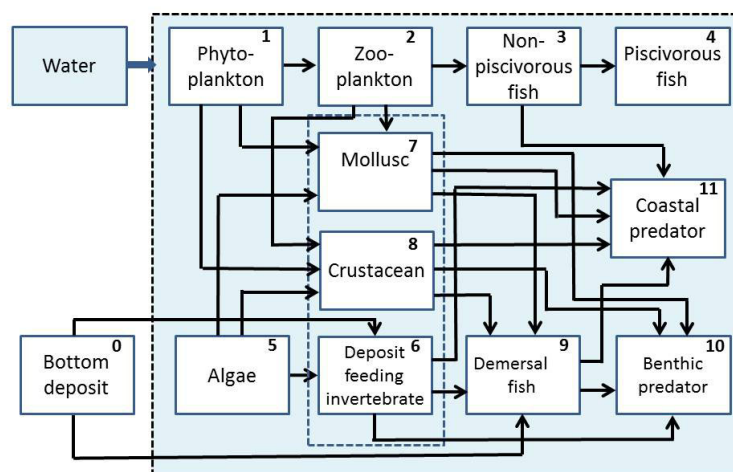

**Figure 1.** Scheme of radionuclide transfer to marine organisms.



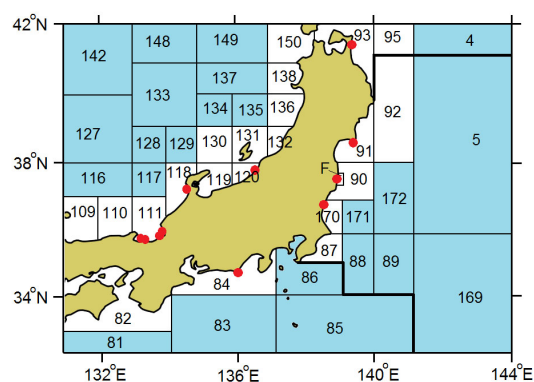

**Figure 2.** The box system for the area close to Fukushima NPP. The shaded boxes represent the deep water boxes. The NPPs are shown by filled circles. Coastal box around the FDNPP (marked by “F” is inside of box 90. Thick line limits the area of the Fukushima accident fallout.

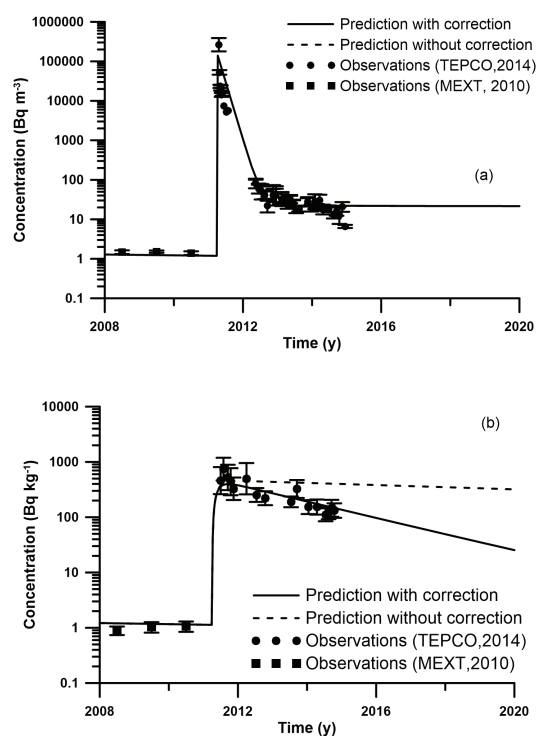

**Figure 3.** Comparison between calculated and observed  $^{137}\text{Cs}$  concentration in seawater (a) and in bottom sediment (b) in the coastal box around the Fukushima Dai-ichi NPP.

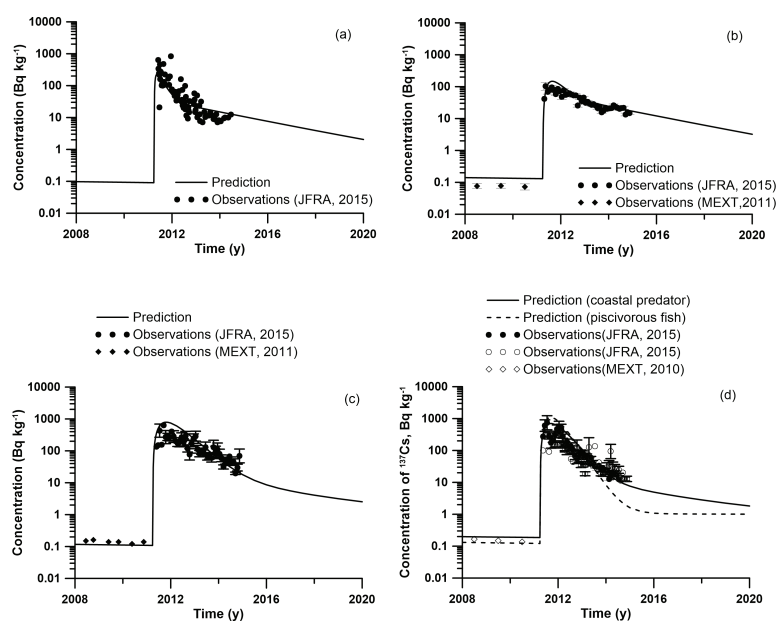

**Figure 4.** Comparison between calculated and observed  $^{137}\text{Cs}$  concentration in deposit feeding invertebrate (a), demersal fish (b), bottom predator (c) and coastal predator (d) around the FDNPP.

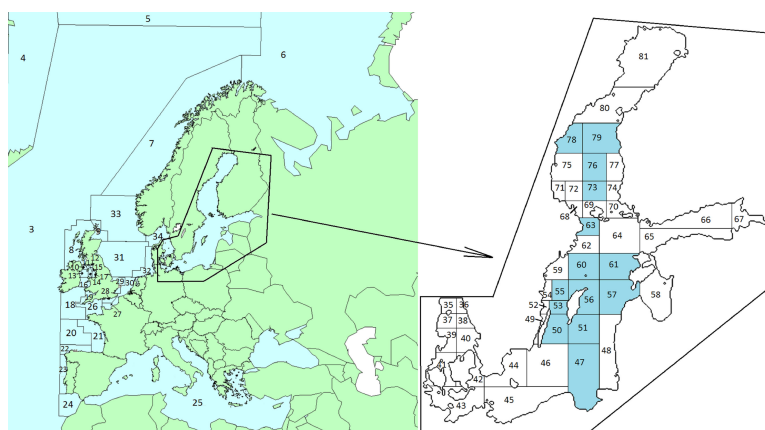

**Figure 5.** Compartment system of POSEIDON-R model for north-eastern part of Atlantic Ocean, the North Sea and the Baltic Sea.

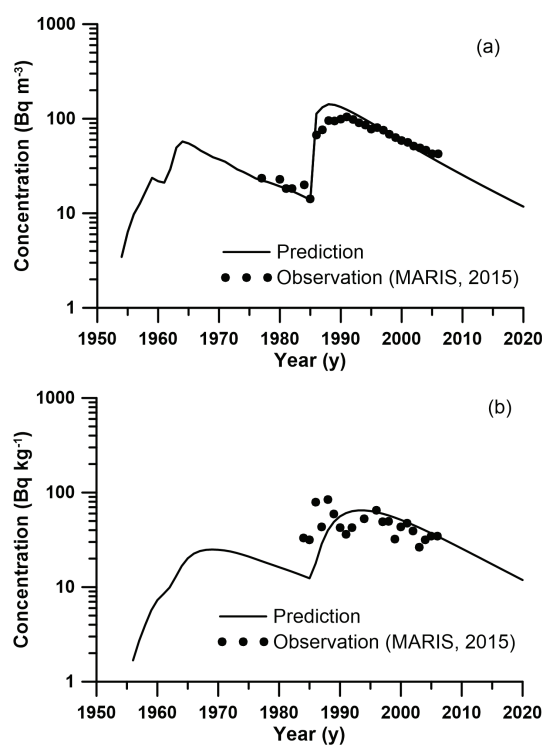

**Figure 6.** Comparison between calculated and observed  $^{137}\text{Cs}$  concentrations in seawater (a) and in bottom sediment (b) for box 45.

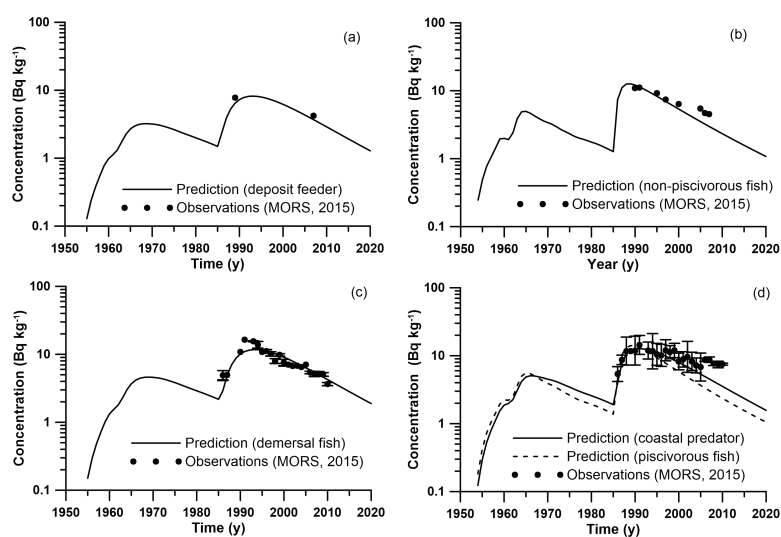

**Figure 7.** Comparison between calculated and observed  $^{137}\text{Cs}$  concentrations in deposit-feeding invertebrate (a), non-piscivorous fish (b), demersal fish (c) and coastal predator (d) for box 45.
